# Supplementary material for: Determination of rare earth elements in graphite by solid sampling electrothermal vaporization-inductively coupled plasma mass spectrometry
Source: Royal Society of Chemistry journal article supplement (doi:10.1039/c5ja00136f), 2015-01-01
Supplement: c5ja00136f1.pdf [file c5ja00136f1.pdf]

## Determination of rare earth elements in graphite by solid sampling electrothermal vaporization-inductively coupled plasma mass spectrometry

P. A. Mello\*, M. F. Pedrotti, S. M. Cruz, E. I. Muller, V. L. Dressler, E. M. M. Flores

*Departamento de Química, Universidade Federal de Santa Maria, 97105-900, Santa Maria,  
RS, Brazil*

\*Corresponding author. Fax: +55 55 3220 9445

E-mail address: paoladeazevedomello@gmail.com

### ELECTRONIC SUPPLEMENTARY INFORMATION

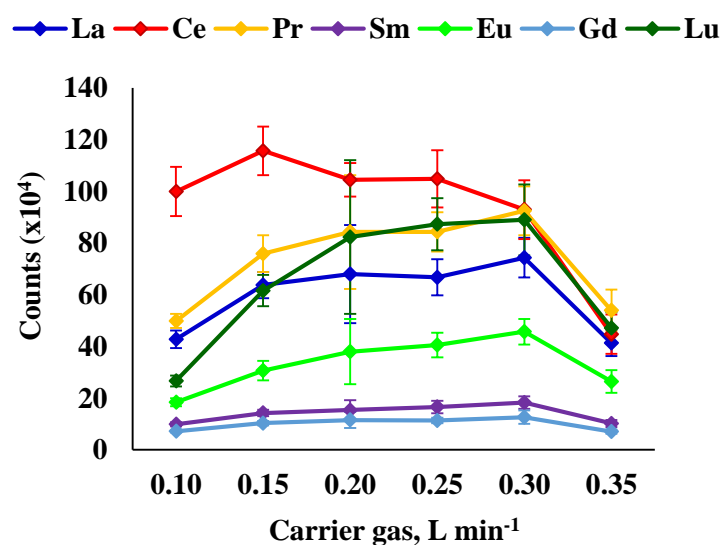

**Fig. S1** Effect of carrier gas flow-rate on reference solution signal intensity. Conditions: 200 pg of REE; 20 s at 600 °C, ramp of 5 s; 30 s at 100 °C, ramp of 1 s; 6 s at 1600 °C, ramp of 0 s; 5 s at 100 °C ramp of 1 s; 6 s at 2200 °C, ramp of 0 s. Modifier gas flow-rate: 3.0 mL min<sup>-1</sup>. Error bars represent the standard deviation (n = 3).

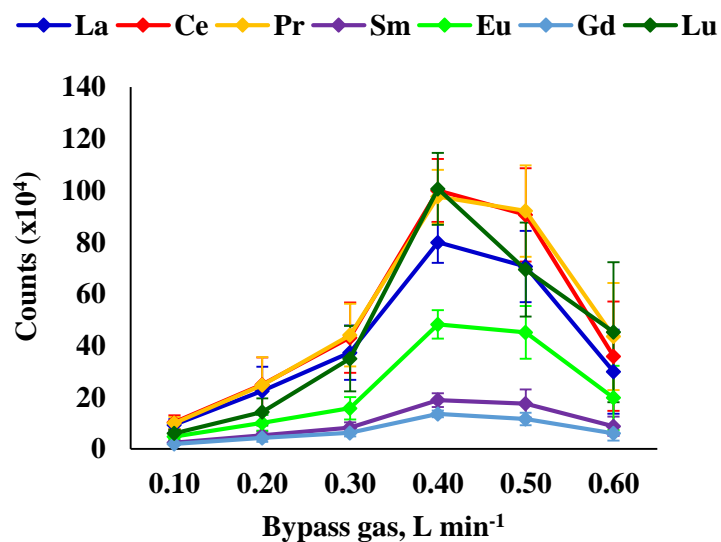

**Fig. S2** Effect of bypass gas flow-rate on reference solution signal intensity. Conditions: 200 pg of REE; 20 s at 600 °C, ramp of 5 s; 30 s at 100 °C, ramp of 1 s; 6 s at 1600 °C, ramp of 0 s; 5 s at 100 °C ramp of 1 s; 6 s at 2200 °C, ramp of 0 s. Modifier gas flow-rate: 3.0 mL min<sup>-1</sup>. Error bars represent the standard deviation (n = 3).
